# Supplementary material for: Evidence of Ostwald ripening during evolution of micro-scale solid carbon spheres
Source: PubMed Central journal article supplement — Sci Rep. 2014 Jan 6;4:3579. doi: 10.1038/srep03579 (PMC3880962; doi:10.1038/srep03579), 2014-01-06
Supplement: srep03579-s1.pdf [file srep03579-s1.pdf]

## Supplementary Information

### Evidence of Ostwald ripening during evolution of micro-scale solid carbon spheres

Heon Ham<sup>1,\*</sup>, No-Hyung Park<sup>2</sup>, Sang Sub Kim<sup>3,\*</sup> & Hyoun Woo Kim<sup>4,\*</sup>

<sup>1</sup>H&H Co. Ltd., Korea National University of Transportation, 50 Daehak-ro,  
Chungju-si, Chungbuk 330-702, Republic of Korea

<sup>2</sup>Department of Textile Convergence of Biotechnology & Nanotechnology, Korea  
Institute of Industrial Technology 1271-18 Sa 3-dong, Sangnok-gu, Ansan-si,  
Gyeonggi-do, 426-910, Republic of Korea

<sup>3</sup>Department of Materials Science and Engineering, Inha University, Incheon  
402-751, Republic of Korea.

<sup>4</sup>Division of Materials Science and Engineering, Hanyang University, Seoul 133-  
791, Republic of Korea

\*Corresponding Authors E-mail: [hh1001@hanyang.ac.kr](mailto:hh1001@hanyang.ac.kr); [sangsub@inha.ac.kr](mailto:sangsub@inha.ac.kr);  
[hyounwoo@hanyang.ac.kr](mailto:hyounwoo@hanyang.ac.kr).

## Raman Analysis

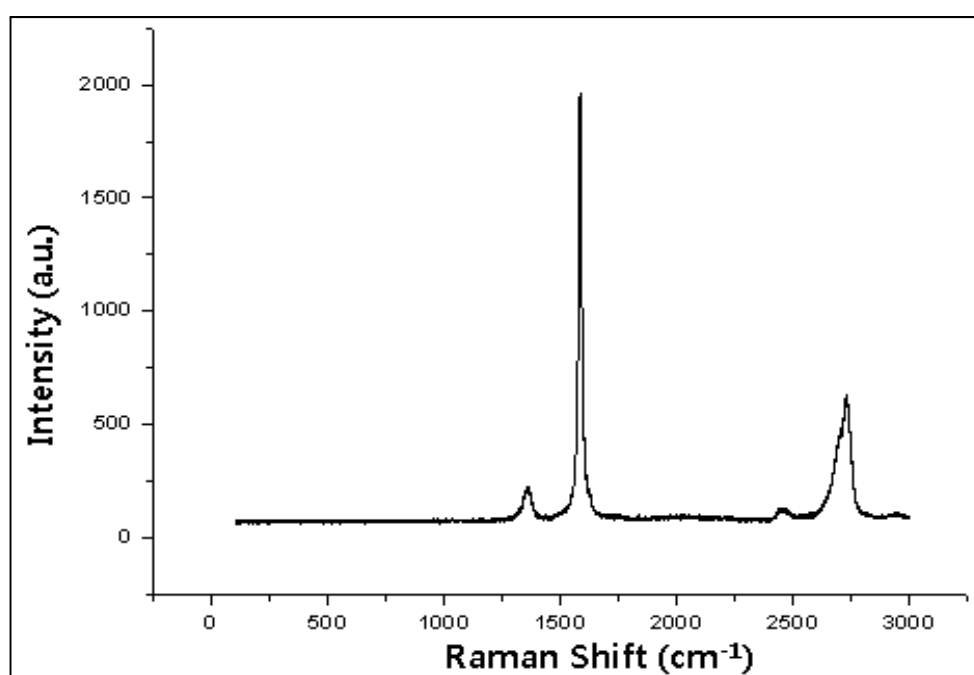

Supplementary Figure S1 | Raman spectrum of micro-scale SCSs.

Figure S1 shows a micro Raman spectrum of the micro-scale SCSs fabricated by means of using the microwave technique. This spectrum shows mainly three Raman bands at  $\sim 1382\text{ cm}^{-1}$  (D band),  $\sim 1582\text{ cm}^{-1}$  (G band), and  $\sim 2695\text{ cm}^{-1}$  (2nd order band). The G band indicates the original graphite feature because of the in-plane vibration of  $\text{sp}^2$  carbon atoms, and the D band is due to amorphous carbons which have a certain fraction of  $\text{sp}^3$  carbon bonding structures. The value of  $I_D/I_G$  is 0.81.
